# Supplementary material for: Positive Correlation of the Gene Rearrangements and Evolutionary Rates in the Mitochondrial Genomes of Thrips (Insecta: Thysanoptera)
Source: MDPI journal article supplement (doi:10.3390/insects13070585), 2022-06-27
Supplement: s1 [file s1]

**Table S1.** Features of the mitogenome of *Aeolothrips xinjiangensis*.

| Gene         | Direction | Location    | Size | Anticodon | Codon |      | Intergenic nucleotides |
|--------------|-----------|-------------|------|-----------|-------|------|------------------------|
|              |           |             | (bp) |           | Start | Stop |                        |
| <i>COI</i>   | F         | 1-1560      | 1560 |           | ATA   | TAG  | 0                      |
| <i>trnS1</i> | F         | 1560-1624   | 65   | TCT       |       |      | -1                     |
| <i>srRNA</i> | F         | 1625-2409   | 785  |           |       |      | 0                      |
| <i>ATP8</i>  | F         | 2410-2574   | 165  |           | ATC   | TAG  | 0                      |
| <i>ATP6</i>  | F         | 2571-3252   | 684  |           | ATG   | T    | -4                     |
| <i>trnK</i>  | F         | 3253-3318   | 66   | TTT       |       |      | -2                     |
| <i>ND1</i>   | F         | 3382-4301   | 920  |           | ATT   | TA   | 63                     |
| <i>trnL2</i> | F         | 4302-4367   | 66   | TAA       |       |      | 0                      |
| <i>trnW</i>  | F         | 4366-4431   | 66   | TCA       |       |      | -2                     |
| <i>trnR</i>  | F         | 4441-4512   | 72   | TCG       |       |      | 9                      |
| CR1          |           | 4513-6106   | 1594 |           |       |      | 0                      |
| <i>COII</i>  | F         | 6107-6778   | 672  |           | ATA   | TAA  | 0                      |
| <i>trnL1</i> | F         | 6808-6874   | 67   | TAG       |       |      | 29                     |
| <i>COIII</i> | F         | 6906-7694   | 789  |           | TTG   | TAA  | 31                     |
| <i>ND3</i>   | F         | 7701-8051   | 351  |           | ATG   | TAA  | 6                      |
| <i>trnN</i>  | F         | 8064-8131   | 68   | GTT       |       |      | 12                     |
| <i>trnE</i>  | F         | 8130-8199   | 70   | TTC       |       |      | -2                     |
| <i>trnQ</i>  | F         | 8222-8289   | 68   | TTG       |       |      | 22                     |
| <i>trnI</i>  | F         | 8291-8358   | 68   | GAT       |       |      | 1                      |
| <i>CYTB</i>  | F         | 8361-9491   | 1131 |           | ATA   | TAG  | 2                      |
| <i>trnG</i>  | F         | 9491-9563   | 73   | TCC       |       |      | -1                     |
| CR2          |           | 9564-9919   | 356  |           |       |      | 0                      |
| <i>ND2</i>   | R         | 9920-10963  | 1044 |           | ATA   | TAA  | 0                      |
| <i>trnC</i>  | R         | 10964-11026 | 63   | GCA       |       |      | 0                      |
| <i>trnY</i>  | R         | 11029-11095 | 67   | GTA       |       |      | 2                      |
| <i>ND5</i>   | R         | 11094-12800 | 1707 |           | ATT   | TAA  | -2                     |
| <i>trnH</i>  | R         | 12801-12865 | 65   | GTG       |       |      | 0                      |
| <i>ND4</i>   | R         | 12869-14191 | 1323 |           | ATG   | TAA  | 3                      |
| <i>ND4L</i>  | R         | 14340-14624 | 285  |           | ATA   | TAA  | 148                    |
| <i>trnT</i>  | F         | 14643-14703 | 61   | TGT       |       |      | 18                     |
| <i>trnP</i>  | R         | 14749-14815 | 67   | TGG       |       |      | 45                     |
| <i>ND6</i>   | F         | 14818-15321 | 504  |           | ATA   | TAA  | 2                      |
| <i>trnM</i>  | F         | 15322-15386 | 65   | CAT       |       |      | 0                      |
| <i>trnA</i>  | F         | 15387-15452 | 66   | TGC       |       |      | 0                      |
| <i>trnF</i>  | F         | 15453-15518 | 66   | GAA       |       |      | 0                      |
| <i>trnV</i>  | F         | 15521-15587 | 67   | TAC       |       |      | 2                      |
| <i>lrRNA</i> | F         | 15588-16806 | 1219 |           |       |      | 0                      |
| <i>trnS2</i> | F         | 16807-16876 | 70   | TGA       |       |      | 0                      |
| <i>trnD</i>  | F         | 16882-16947 | 66   | GTC       |       |      | 5                      |

Note: Intergenic sequences refer to intergenic regions between each gene and the gene after it.

**Table S2.** Codon usage of 13 PCGs in the mitogenome of *Aeolothrips xinjiangensis*.

| Codon                | Count      | Codon         | Count      | Codon                | Count      | Codon                | Count      |
|----------------------|------------|---------------|------------|----------------------|------------|----------------------|------------|
| <b>UUU(F)</b>        | <b>376</b> | <b>UCU(S)</b> | <b>139</b> | <b>UAU(Y)</b>        | <b>123</b> | <b>UGU(C)</b>        | <b>60</b>  |
| <u>UUC(F)</u>        | 49         | <u>UCC(S)</u> | 29         | <u>UAC(Y)</u>        | 36         | <u>UGC(C)</u>        | 5          |
| <b>UUA(L)</b>        | <b>297</b> | <u>UCA(S)</u> | 88         | UAA (*)              | 8          | <b><u>UGA(W)</u></b> | <b>88</b>  |
| UUG(L)               | 42         | UCG(S)        | 13         | UAG (*)              | 3          | UGG(W)               | 9          |
| CUU(L)               | 91         | <b>CCU(P)</b> | <b>56</b>  | <b>CAU(H)</b>        | <b>51</b>  | <b>CGU(R)</b>        | <b>11</b>  |
| CUC(L)               | 10         | CCC(P)        | 16         | <u>CAC(H)</u>        | 11         | CGC(R)               | 0          |
| <b><u>CUA(L)</u></b> | <b>50</b>  | <u>CCA(P)</u> | 48         | <b><u>CAA(Q)</u></b> | <b>47</b>  | <u>CGA(R)</u>        | 34         |
| CUG(L)               | 10         | CCG(P)        | 7          | CAG(Q)               | 3          | CGG(R)               | 4          |
| <b>AUU(I)</b>        | <b>309</b> | <b>ACU(T)</b> | <b>62</b>  | <b>AAU(N)</b>        | <b>138</b> | AGU(S)               | 27         |
| <u>AUC(I)</u>        | 29         | ACC(T)        | 19         | <u>AAC(N)</u>        | 34         | AGC(S)               | 1          |
| <b>AUA(M)</b>        | <b>226</b> | <u>ACA(T)</u> | 84         | <b><u>AAA(K)</u></b> | <b>117</b> | <b><u>AGA(S)</u></b> | <b>65</b>  |
| <u>AUG(M)</u>        | 38         | ACG(T)        | 2          | AAG(K)               | 20         | AGG(S)               | 12         |
| <b>GUU(V)</b>        | <b>103</b> | <b>GCU(A)</b> | <b>66</b>  | <b>GAU(D)</b>        | <b>57</b>  | GGU(G)               | 49         |
| GUC(V)               | 9          | GCC(A)        | 13         | <u>GAC(D)</u>        | 10         | GGC(G)               | 2          |
| <u>GUA(V)</u>        | 85         | <u>GCA(A)</u> | 40         | <b><u>GAA(E)</u></b> | <b>87</b>  | <b><u>GGA(G)</u></b> | <b>140</b> |
| GUG(V)               | 13         | GCG(A)        | 4          | GAG(E)               | 17         | GGG(G)               | 18         |

NOTE. AA indicates amino acid. tRNAs are represented by the IUPAC-IUB single letter amino acid codes. N is the number of times of a codon is used. The asterisk (\*) indicates a termination codon. Values in bold type stand for the most commonly used codon for amino acid. Underlined stand for the cognate codon of tRNA for each amino acid.

**TableS3.** Comparison of the degree of gene rearrangement (breakpoints), non-synonymous substitution rates (Ka) and intergenic nucleotides between *ND4* and *ND4L* in the mitogenomes of fourteen thrips.

| Species                             | Ka    | Breakpoints | Branch length (Mya) | Intergenic nucleotides ( <i>ND4-ND4L</i> ) |
|-------------------------------------|-------|-------------|---------------------|--------------------------------------------|
| <i>Haplothrips aculeatus</i>        | 0.501 | 31          | 6.63                | -7                                         |
| <i>Gynaikothrips uzeli</i>          | 0.506 | 33          | 7.06                | -7                                         |
| <i>Franklinothrips vespiformis</i>  | 0.326 | 29          | 3.6                 | -7                                         |
| <i>Aeolothrips xinjiangensis</i>    | 0.453 | 28          | 3.91                | 148                                        |
| <i>Holarthrothrips indicus</i>      | 0.351 | 25          | 3.04                | -1                                         |
| <i>Rhipiphorotherips cruentatus</i> | 0.417 | 25          | 4.4                 | -7                                         |
| <i>Dendrothrips minowai</i>         | 0.416 | 28          | 4.23                | 10                                         |
| <i>Anaphothrips obscurus</i>        | 0.421 | 29          | 4.45                | -7                                         |
| <i>Thrips palmi</i>                 | 0.414 | 31          | 4.44                | -7                                         |
| <i>Thrips imaginis</i>              | 0.417 | 30          | 4.67                | -21                                        |
| <i>Franklinithrips occidentalis</i> | 0.422 | 30          | 4.73                | 18                                         |
| <i>Franklinithrips intonsa</i>      | 0.435 | 30          | 4.79                | -7                                         |
| <i>Neohydatothrips samayunkur</i>   | 0.446 | 33          | 5                   | -7                                         |
| <i>Scritothrips dorsalis</i>        | 0.427 | 30          | 4.46                | 5                                          |

NOTE. The represents (+) values as intergenic nucleotides and (-) values as overlapping regions of intergenic nucleotides.

**Table S4.** Normality test for the Ka values, breakpoint values, and branch lengths in the phylogenetic tree.

| Data          | Statistical magnitude | <i>df</i> | <i>p</i> |
|---------------|-----------------------|-----------|----------|
| Ka            | 0.899                 | 14        | 0.109    |
| Breakpoints   | 0.920                 | 14        | 0.221    |
| Branch length | 0.868                 | 14        | 0.039    |

NOTE. *df* is the sample size. *p*, >0.05 (conforms to normal distribution) and > 0.05 (not conforms to normal distribution).

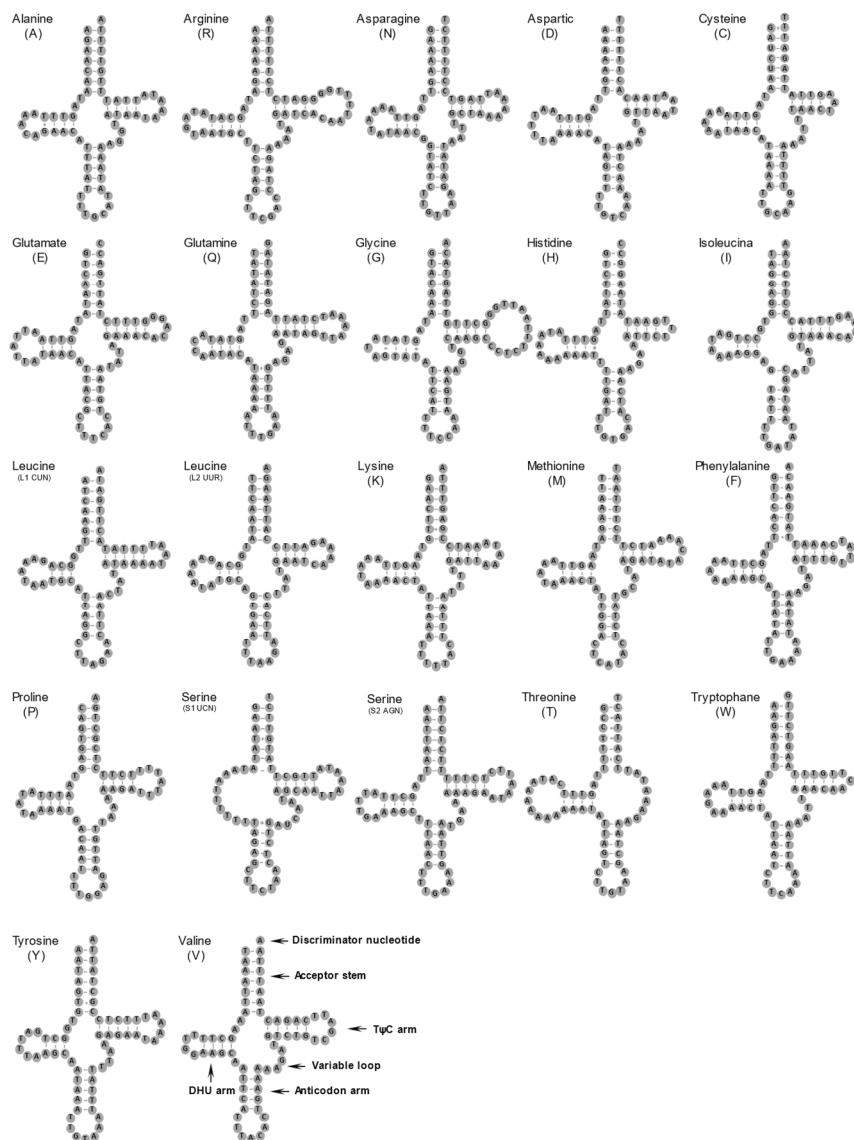

**Figure S1.** The secondary structure of 22 tRNAs. The tRNAs are labeled with the abbreviations of their corresponding amino acids. Inferred Watson-Crick bonds are illustrated by lines, while the mismatches are illustrated by dots.
